# Supplementary material for: Validation of diffusion tensor MRI measurements of cardiac microstructure with structure tensor synchrotron radiation imaging
Source: PubMed Central journal article supplement (PMC5345150; doi:10.1186/s12968-017-0342-x), 2017-03-10
Supplement: 12968_2017_342_MOESM2_ESM.pdf [file 12968_2017_342_MOESM2_ESM.pdf]

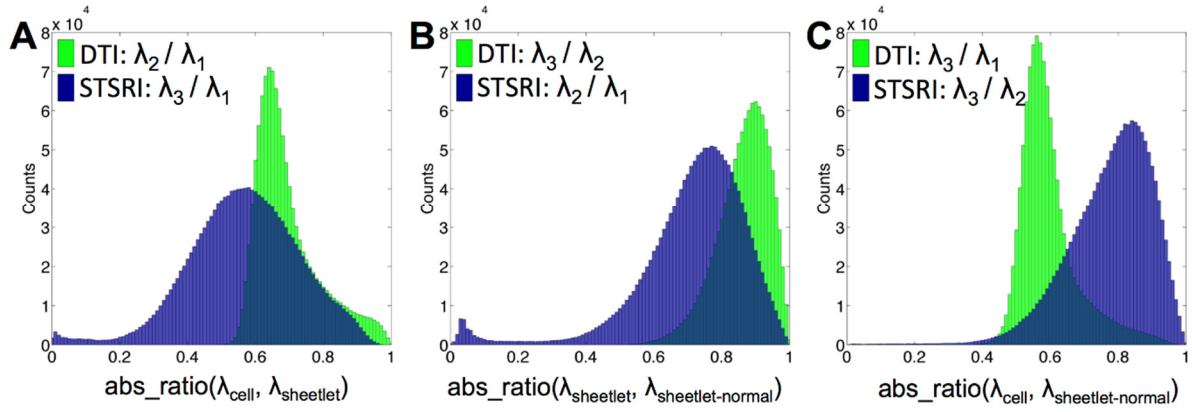

Figure S1. Histograms of ratios of principal eigenvalues. STSRI data were reconstructed at 3.6  $\mu\text{m}$  isotropic resolution. (A)  $\text{abs\_ratio}(\lambda_{\text{cell}}, \lambda_{\text{sheetlet}})$ , (B)  $\text{abs\_ratio}(\lambda_{\text{sheetlet}}, \lambda_{\text{sheetlet-normal}})$  and (C)  $\text{abs\_ratio}(\lambda_{\text{cell}}, \lambda_{\text{sheetlet-normal}})$  in diffusion tensor imaging (DTI) and structure tensor synchrotron radiation imaging (STSRI), where  $\text{abs\_ratio}(\lambda_i, \lambda_j) = \{ \lambda_i/\lambda_j \text{ if } \lambda_i \leq \lambda_j \text{ or } \lambda_j/\lambda_i \text{ if } \lambda_i > \lambda_j$ . Eigenvalues are better separated in the STSRI data corresponding to the (i) putative cell and sheetlet orientations:  $(\lambda_2/\lambda_1)_{\text{DT}}$ ,  $\text{mean} = 0.69$  versus  $(\lambda_3/\lambda_1)_{\text{ST}}$ ,  $\text{mean} = 0.58$ , and (ii) putative sheetlet and sheetlet-normal orientations:  $(\lambda_3/\lambda_2)_{\text{DT}}$ ,  $\text{mean} = 0.86$  versus  $(\lambda_2/\lambda_1)_{\text{ST}}$ ,  $\text{mean} = 0.71$ . Eigenvalues are better separated in the DTI data corresponding to putative cell and sheetlet-normal orientations:  $(\lambda_3/\lambda_1)_{\text{DT}}$ ,  $\text{mean} = 0.60$  versus  $(\lambda_3/\lambda_2)_{\text{ST}}$ ,  $\text{mean} = 0.78$ .
